# Supplementary material
Source: PubMed Central journal article supplement (PMC5524128)
Supplement: NIHMS866942-supplement-Supplemental_Digital_Content.pdf [file NIHMS866942-supplement-Supplemental_Digital_Content.pdf]

## Supplemental Digital Content

For all tables: Predicted differences (95% CI) were estimated from linear mixed effects models adjusted for age, age squared, race/ethnicity, an interaction term between age and phthalate concentration categories, an interaction term between age squared and phthalate concentration categories, and an interaction term between race/ethnicity and age.

Table 1. Predicted differences in body mass index ( $\text{kg}/\text{m}^2$ ) from 7-13 years among girls comparing those with low, medium, and high concentrations of MBZP, MCPP, and MEHP<sup>a</sup>.

| Comparison of<br>Categories of<br>Concentrations | Age<br>(years) | MBZP                                  |            | MCPP                                  |            | MEHP                                  |            |
|--------------------------------------------------|----------------|---------------------------------------|------------|---------------------------------------|------------|---------------------------------------|------------|
|                                                  |                | Predicted                             | 95% CI     | Predicted                             | 95% CI     | Predicted                             | 95% CI     |
|                                                  |                | Difference,<br>$\text{kg}/\text{m}^2$ |            | Difference,<br>$\text{kg}/\text{m}^2$ |            | Difference,<br>$\text{kg}/\text{m}^2$ |            |
| Medium vs Low                                    | 7              | 0.36                                  | -0.11-0.83 | 0.09                                  | -0.38-0.56 | -0.01                                 | -0.51-0.50 |
| Medium vs Low                                    | 8              | 0.52                                  | 0.03-1.0   | -0.03                                 | -0.52-0.46 | -0.03                                 | -0.56-0.49 |
| Medium vs Low                                    | 9              | 0.66                                  | 0.13-1.2   | -0.09                                 | -0.61-0.43 | -0.06                                 | -0.62-0.51 |
| Medium vs Low                                    | 10             | 0.77                                  | 0.20-1.3   | -0.09                                 | -0.66-0.48 | -0.08                                 | -0.69-0.54 |
| Medium vs Low                                    | 11             | 0.85                                  | 0.24-1.5   | -0.04                                 | -0.66-0.58 | -0.10                                 | -0.76-0.57 |

|                |    |       |            |       |            |       |            |
|----------------|----|-------|------------|-------|------------|-------|------------|
| Medium vs Low  | 12 | 0.92  | 0.25-1.6   | 0.08  | -0.59-0.75 | -0.11 | -0.84-0.61 |
| Medium vs Low  | 13 | 0.95  | 0.22-1.7   | 0.26  | -0.48-0.99 | -0.12 | -0.92-0.67 |
| High vs Low    | 7  | -0.09 | -0.63-0.45 | -0.03 | -0.56-0.49 | -0.26 | -0.73-0.22 |
| High vs Low    | 8  | -0.06 | -0.62-0.50 | -0.25 | -0.79-0.30 | -0.41 | -0.91-0.08 |
| High vs Low    | 9  | -0.03 | -0.63-0.57 | -0.40 | -0.99-0.18 | -0.52 | -1.1-0.00  |
| High vs Low    | 10 | 0.01  | -0.65-0.66 | -0.50 | -1.1-0.14  | -0.59 | -1.2--0.02 |
| High vs Low    | 11 | 0.04  | -0.67-0.75 | -0.53 | -1.2-0.16  | -0.62 | -1.3-0.01  |
| High vs Low    | 12 | 0.08  | -0.69-0.85 | -0.51 | -1.3-0.24  | -0.60 | -1.3-0.08  |
| High vs Low    | 13 | 0.12  | -0.73-0.96 | -0.43 | -1.3-0.40  | -0.54 | -1.3-0.20  |
| High vs Medium | 7  | -0.45 | -0.94-0.04 | -0.12 | -0.63-0.38 | -0.25 | -0.74-0.24 |
| High vs Medium | 8  | -0.58 | -1.1--0.07 | -0.22 | -0.74-0.31 | -0.38 | -0.89-0.13 |
| High vs Medium | 9  | -0.68 | -1.2--0.14 | -0.31 | -0.87-0.25 | -0.47 | -1.0-0.08  |
| High vs Medium | 10 | -0.76 | -1.4--0.17 | -0.40 | -1.0-0.21  | -0.52 | -1.1-0.08  |
| High vs Medium | 11 | -0.81 | -1.5--0.16 | -0.50 | -1.2-0.17  | -0.52 | -1.2-0.12  |

|                |    |       |            |       |           |       |           |
|----------------|----|-------|------------|-------|-----------|-------|-----------|
| High vs Medium | 12 | -0.84 | -1.5--0.13 | -0.59 | -1.3-0.14 | -0.49 | -1.2-0.21 |
| High vs Medium | 13 | -0.83 | -1.6--0.06 | -0.68 | -1.5-0.11 | -0.42 | -1.2-0.35 |

<sup>a</sup> MBzP concentration categories: low, <13 µg/g creatinine); medium, 13-<38 µg/g creatinine; and high, >=38 µg/g creatinine). MCPPE concentration categories: low, <5.0 µg/g creatinine; medium, 5.0-<10 µg/g creatinine; and high, >=10 µg/g creatinine. MEHP concentration categories: low, <2.8 µg/g creatinine; medium, 2.8-<5.6 µg/g creatinine; and high, >=5.6 µg/g creatinine.

Table 2. Predicted differences in body mass index (kg/m<sup>2</sup>) from 7-13 years among girls comparing those with low, medium, and high concentrations of MEHHP, MEOHP, and MECPP<sup>a</sup>.

| Comparisons of<br>Categories of<br>Concentrations | Age<br>(years) | MEHHP                            |            | MEOHP                            |            | MECPP                             |            |
|---------------------------------------------------|----------------|----------------------------------|------------|----------------------------------|------------|-----------------------------------|------------|
|                                                   |                | Predicted                        | 95% CI     | Predicted                        | 95% CI     | Predicted                         | 95% CI     |
|                                                   |                | Difference,<br>kg/m <sup>2</sup> |            | Difference,<br>kg/m <sup>2</sup> |            | Difference<br>, kg/m <sup>2</sup> |            |
| Medium vs Low                                     | 7              | 0.11                             | -0.36-0.58 | 0.07                             | -0.44-0.59 | -0.31                             | -0.80-0.17 |
| Medium vs Low                                     | 8              | 0.13                             | -0.36-0.61 | 0.24                             | -0.29-0.78 | -0.35                             | -0.85-0.15 |
| Medium vs Low                                     | 9              | 0.17                             | -0.35-0.69 | 0.40                             | -0.18-0.97 | -0.37                             | -0.90-0.17 |
| Medium vs Low                                     | 10             | 0.25                             | -0.32-0.81 | 0.54                             | -0.08-1.2  | -0.35                             | -0.93-0.24 |

|                |    |       |            |       |            |       |            |
|----------------|----|-------|------------|-------|------------|-------|------------|
| Medium vs Low  | 11 | 0.35  | -0.26-0.97 | 0.67  | 0.00-1.4   | -0.30 | -0.94-0.34 |
| Medium vs Low  | 12 | 0.49  | -0.18-1.2  | 0.79  | 0.06-1.5   | -0.22 | -0.92-0.47 |
| Medium vs Low  | 13 | 0.65  | -0.08-1.4  | 0.90  | 0.10-1.7   | -0.11 | -0.87-0.64 |
| High vs Low    | 7  | -0.02 | -0.56-0.53 | -0.02 | -0.58-0.54 | -0.29 | -0.85-0.27 |
| High vs Low    | 8  | 0.04  | -0.52-0.61 | 0.08  | -0.49-0.66 | -0.26 | -0.84-0.32 |
| High vs Low    | 9  | 0.13  | -0.48-0.73 | 0.19  | -0.43-0.81 | -0.21 | -0.83-0.42 |
| High vs Low    | 10 | 0.23  | -0.42-0.89 | 0.30  | -0.38-0.97 | -0.13 | -0.81-0.55 |
| High vs Low    | 11 | 0.36  | -0.35-1.1  | 0.41  | -0.33-1.1  | -0.03 | -0.77-0.70 |
| High vs Low    | 12 | 0.51  | -0.27-1.3  | 0.52  | -0.28-1.3  | 0.09  | -0.72-0.89 |
| High vs Low    | 13 | 0.68  | -0.17-1.5  | 0.64  | -0.24-1.5  | 0.23  | -0.65-1.1  |
| High vs Medium | 7  | -0.12 | -0.62-0.37 | -0.09 | -0.55-0.37 | 0.02  | -0.46-0.51 |
| High vs Medium | 8  | -0.08 | -0.60-0.43 | -0.16 | -0.63-0.32 | 0.09  | -0.41-0.60 |
| High vs Medium | 9  | -0.05 | -0.60-0.51 | -0.21 | -0.72-0.30 | 0.16  | -0.38-0.70 |
| High vs Medium | 10 | -0.02 | -0.62-0.59 | -0.25 | -0.80-0.31 | 0.22  | -0.37-0.81 |

|                |    |      |            |       |            |      |            |
|----------------|----|------|------------|-------|------------|------|------------|
| High vs Medium | 11 | 0.01 | -0.65-0.66 | -0.27 | -0.87-0.34 | 0.27 | -0.38-0.91 |
| High vs Medium | 12 | 0.02 | -0.69-0.73 | -0.27 | -0.93-0.39 | 0.31 | -0.39-1.0  |
| High vs Medium | 13 | 0.03 | -0.75-0.81 | -0.26 | -0.98-0.45 | 0.34 | -0.42-1.1  |

<sup>a</sup> MEHHP concentration categories: low, <29 µg/g creatinine); medium, 29-<88 µg/g creatinine; and high, >=88 µg/g creatinine).

MEOHP concentration categories: low, <15 µg/g creatinine; medium, 15-<44 µg/g creatinine; and high, >=44 µg/g creatinine. MECPP

concentration categories: low, <46 µg/g creatinine; medium, 46-<139 µg/g creatinine; and high, >=139 µg/g creatinine.

Table 3. Predicted differences in body mass index (kg/m<sup>2</sup>) from 7-13 years among girls comparing those with low, medium, and high concentrations of DEHP<sup>a</sup>.

| Comparisons of<br>Categories of<br>Concentrations | Age<br>(years) | Predicted<br>Difference,<br>kg/m <sup>2</sup> | 95% CI     |
|---------------------------------------------------|----------------|-----------------------------------------------|------------|
| Medium vs Low                                     | 7              | -0.01                                         | -0.44-0.42 |
| Medium vs Low                                     | 8              | 0.04                                          | -0.41-0.49 |
| Medium vs Low                                     | 9              | 0.09                                          | -0.39-0.58 |

|                |    |       |            |
|----------------|----|-------|------------|
| Medium vs Low  | 10 | 0.15  | -0.38-0.68 |
| Medium vs Low  | 11 | 0.21  | -0.37-0.79 |
| Medium vs Low  | 12 | 0.28  | -0.35-0.91 |
| Medium vs Low  | 13 | 0.35  | -0.35-1.0  |
| High vs Low    | 7  | -0.02 | -0.51-0.47 |
| High vs Low    | 8  | 0.02  | -0.49-0.53 |
| High vs Low    | 9  | 0.09  | -0.46-0.65 |
| High vs Low    | 10 | 0.19  | -0.42-0.80 |
| High vs Low    | 11 | 0.31  | -0.35-0.97 |
| High vs Low    | 12 | 0.46  | -0.27-1.2  |
| High vs Low    | 13 | 0.63  | -0.17-1.4  |
| High vs Medium | 7  | -0.01 | -0.50-0.48 |
| High vs Medium | 8  | -0.02 | -0.53-0.49 |
| High vs Medium | 9  | 0.00  | -0.55-0.55 |

|                |    |      |            |
|----------------|----|------|------------|
| High vs Medium | 10 | 0.04 | -0.57-0.64 |
| High vs Medium | 11 | 0.10 | -0.56-0.76 |
| High vs Medium | 12 | 0.18 | -0.55-0.90 |
| High vs Medium | 13 | 0.28 | -0.52-1.1  |

<sup>a</sup>DEHP concentration categories: low, <111 µg/g creatinine; medium, 111- ≤278 µg/g creatinine; and high, >278 µg/g creatinine.

Table 4. Predicted differences<sup>a</sup> in body mass index (kg/m<sup>2</sup>) from 7-13 years among girls comparing those with low, medium, and high concentrations of MEP, MBP, and MiBP<sup>a</sup>.

| Comparison of<br>Categories of<br>Concentrations | Age<br>(years) | MEP                             |            | MBP                             |            | MiBP                            |            |
|--------------------------------------------------|----------------|---------------------------------|------------|---------------------------------|------------|---------------------------------|------------|
|                                                  |                | Predicted                       | 95% CI     | Predicted                       | 95% CI     | Predicted                       | 95% CI     |
|                                                  |                | Difference<br>kg/m <sup>2</sup> |            | Difference<br>kg/m <sup>2</sup> |            | Difference<br>kg/m <sup>2</sup> |            |
| Medium vs Low                                    | 7              | -0.11                           | -0.60-0.38 | 0.22                            | -0.35-0.79 | -0.06                           | -0.54-0.42 |
| Medium vs Low                                    | 8              | -0.02                           | -0.53-0.49 | 0.29                            | -0.29-0.88 | -0.04                           | -0.54-0.45 |
| Medium vs Low                                    | 9              | 0.04                            | -0.51-0.59 | 0.36                            | -0.26-0.99 | 0.00                            | -0.54-0.53 |
| Medium vs Low                                    | 10             | 0.06                            | -0.54-0.66 | 0.42                            | -0.26-1.1  | 0.06                            | -0.52-0.64 |
| Medium vs Low                                    | 11             | 0.05                            | -0.60-0.70 | 0.48                            | -0.26-1.2  | 0.14                            | -0.49-0.77 |

|                |    |       |            |      |            |      |            |
|----------------|----|-------|------------|------|------------|------|------------|
| Medium vs Low  | 12 | 0.02  | -0.69-0.72 | 0.54 | -0.27-1.3  | 0.25 | -0.44-0.93 |
| Medium vs Low  | 13 | -0.06 | -0.83-0.72 | 0.59 | -0.29-1.5  | 0.37 | -0.38-1.1  |
| High vs Low    | 7  | 0.51  | -0.06-1.1  | 0.57 | -0.04-1.2  | 0.25 | -0.29-0.80 |
| High vs Low    | 8  | 0.69  | 0.10-1.3   | 0.61 | -0.01-1.2  | 0.29 | -0.28-0.86 |
| High vs Low    | 9  | 0.84  | 0.21-1.5   | 0.66 | -0.01-1.3  | 0.34 | -0.27-0.95 |
| High vs Low    | 10 | 0.94  | 0.25-1.6   | 0.71 | -0.02-1.5  | 0.42 | -0.24-1.1  |
| High vs Low    | 11 | 1.0   | 0.25-1.8   | 0.77 | -0.03-1.6  | 0.52 | -0.20-1.2  |
| High vs Low    | 12 | 1.0   | 0.20-1.8   | 0.82 | -0.05-1.7  | 0.64 | -0.15-1.4  |
| High vs Low    | 13 | 0.98  | 0.09-1.9   | 0.88 | -0.07-1.8  | 0.78 | -0.08-1.6  |
| High vs Medium | 7  | 0.62  | 0.12-1.1   | 0.35 | -0.10-0.80 | 0.32 | -0.17-0.80 |
| High vs Medium | 8  | 0.71  | 0.20-1.2   | 0.32 | -0.14-0.79 | 0.33 | -0.17-0.84 |
| High vs Medium | 9  | 0.80  | 0.25-1.4   | 0.30 | -0.20-0.80 | 0.35 | -0.20-0.89 |
| High vs Medium | 10 | 0.88  | 0.28-1.5   | 0.29 | -0.26-0.83 | 0.36 | -0.23-0.95 |
| High vs Medium | 11 | 0.94  | 0.29-1.6   | 0.28 | -0.31-0.87 | 0.38 | -0.26-1.0  |

|                |    |     |          |      |            |      |           |
|----------------|----|-----|----------|------|------------|------|-----------|
| High vs Medium | 12 | 1.0 | 0.29-1.7 | 0.28 | -0.36-0.93 | 0.39 | -0.31-1.1 |
| High vs Medium | 13 | 1.0 | 0.26-1.8 | 0.29 | -0.41-1.0  | 0.41 | -0.36-1.2 |

<sup>a</sup> MEP concentration levels: low, <39 µg/g creatinine); medium, 39-<136 µg/g creatinine; and high, >=136 µg/g creatinine). MBP concentration levels: low, <22 µg/g creatinine; medium, 22-<67 µg/g creatinine; and high, >=67 µg/g creatinine. MiBP concentration levels: low, <8.9 µg/g creatinine; medium, 8.9-<22 µg/g creatinine; and high, >=22 µg/g creatinine.

Table 5. Predicted differences in waist circumference (cm) from 7-13 years among girls comparing those with low, medium, and high concentrations of MBZP, MCPP, and MEHP<sup>a</sup>.

| Comparisons of<br>Categories of<br>Concentrations | Age<br>(years) | MBZP              |           | MCPP              |           | MEHP              |           |
|---------------------------------------------------|----------------|-------------------|-----------|-------------------|-----------|-------------------|-----------|
|                                                   |                | Predicted         | 95% CI    | Predicted         | 95% CI    | Predicted         | 95% CI    |
|                                                   |                | Difference,<br>cm |           | Difference,<br>cm |           | Difference,<br>cm |           |
| Medium vs Low                                     | 7              | 0.98              | -0.54-2.5 | 0.27              | -1.2-1.8  | -0.14             | -1.7-1.5  |
| Medium vs Low                                     | 8              | 1.3               | -0.05-2.6 | -0.18             | -1.5-1.1  | -0.38             | -1.8-1.0  |
| Medium vs Low                                     | 9              | 1.4               | 0.06-2.8  | -0.52             | -1.9-0.85 | -0.54             | -2.0-0.93 |
| Medium vs Low                                     | 10             | 1.5               | -0.03-3.0 | -0.75             | -2.3-0.77 | -0.61             | -2.2-1.0  |

|                |    |       |            |       |            |       |           |
|----------------|----|-------|------------|-------|------------|-------|-----------|
| Medium vs Low  | 11 | 1.5   | -0.23-3.1  | -0.86 | -2.5-0.82  | -0.58 | -2.4-1.2  |
| Medium vs Low  | 12 | 1.3   | -0.56-3.1  | -0.86 | -2.7-1.0   | -0.46 | -2.5-1.5  |
| Medium vs Low  | 13 | 1.0   | -1.1-3.1   | -0.74 | -2.9-1.4   | -0.25 | -2.5-2.0  |
| High vs Low    | 7  | 0.05  | -1.7-1.8   | -0.16 | -1.8-1.5   | -0.49 | -2.0-1.0  |
| High vs Low    | 8  | -0.01 | -1.5-1.5   | -0.89 | -2.4-0.57  | -0.93 | -2.3-0.39 |
| High vs Low    | 9  | -0.07 | -1.6-1.5   | -1.5  | -3.0-0.04  | -1.3  | -2.7-0.12 |
| High vs Low    | 10 | -0.13 | -1.9-1.6   | -2.0  | -3.7--0.26 | -1.5  | -3.0-0.04 |
| High vs Low    | 11 | -0.19 | -2.1-1.7   | -2.3  | -4.2--0.43 | -1.6  | -3.3-0.08 |
| High vs Low    | 12 | -0.25 | -2.4-1.9   | -2.5  | -4.6--0.44 | -1.6  | -3.5-0.24 |
| High vs Low    | 13 | -0.32 | -2.8-2.1   | -2.6  | -5.0--0.22 | -1.6  | -3.7-0.60 |
| High vs Medium | 7  | -0.94 | -2.5-0.61  | -0.44 | -2.0-1.2   | -0.35 | -1.9-1.2  |
| High vs Medium | 8  | -1.3  | -2.6-0.09  | -0.71 | -2.1-0.69  | -0.55 | -1.9-0.82 |
| High vs Medium | 9  | -1.5  | -2.9--0.06 | -0.97 | -2.5-0.51  | -0.73 | -2.2-0.70 |
| High vs Medium | 10 | -1.6  | -3.2--0.02 | -1.2  | -2.9-0.43  | -0.90 | -2.5-0.69 |

|                |    |      |           |      |           |      |           |
|----------------|----|------|-----------|------|-----------|------|-----------|
| High vs Medium | 11 | -1.6 | -3.4-0.13 | -1.4 | -3.3-0.37 | -1.1 | -2.8-0.70 |
| High vs Medium | 12 | -1.5 | -3.5-0.40 | -1.7 | -3.7-0.34 | -1.2 | -3.1-0.75 |
| High vs Medium | 13 | -1.4 | -3.6-0.88 | -1.9 | -4.1-0.44 | -1.3 | -3.5-0.90 |

<sup>a</sup> MBzP concentration categories: low, <13 µg/g creatinine); medium, 13-<38 µg/g creatinine; and high, >=38 µg/g creatinine). MCPP concentration categories: low, <5.0 µg/g creatinine; medium, 5.0-<10 µg/g creatinine; and high, >=10 µg/g creatinine. MEHP concentration categories: low, <2.8 µg/g creatinine; medium, 2.8-<5.6 µg/g creatinine; and high, >=5.6 µg/g creatinine.

Table 6. Predicted differences in waist circumference (cm) from 7-13 years among girls comparing those with low, medium, and high concentrations of MEHHP, MEOHP, and MECPP<sup>a</sup>.

| Comparisons of Categories of Concentrations | Age (years) | MEHHP                    |          | MEOHP                    |           | MECPP                    |           |
|---------------------------------------------|-------------|--------------------------|----------|--------------------------|-----------|--------------------------|-----------|
|                                             |             | Predicted Difference, cm | 95% CI   | Predicted Difference, cm | 95% CI    | Predicted Difference, cm | 95% CI    |
| Medium vs Low                               | 7           | 0.21                     | -1.3-1.7 | 0.12                     | -1.5-1.8  | -0.76                    | -2.3-0.78 |
| Medium vs Low                               | 8           | 0.21                     | -1.1-1.5 | 0.37                     | -1.1-1.8  | -0.92                    | -2.3-0.43 |
| Medium vs Low                               | 9           | 0.32                     | -1.0-1.7 | 0.68                     | -0.82-2.2 | -0.96                    | -2.4-0.45 |

|                |    |      |           |      |           |       |           |
|----------------|----|------|-----------|------|-----------|-------|-----------|
| Medium vs Low  | 10 | 0.54 | -0.97-2.1 | 1.0  | -0.63-2.7 | -0.89 | -2.5-0.67 |
| Medium vs Low  | 11 | 0.86 | -0.80-2.5 | 1.4  | -0.40-3.3 | -0.71 | -2.4-1.0  |
| Medium vs Low  | 12 | 1.3  | -0.54-3.1 | 1.9  | -0.14-3.9 | -0.42 | -2.3-1.5  |
| Medium vs Low  | 13 | 1.8  | -0.26-3.9 | 2.4  | 0.07-4.7  | -0.02 | -2.2-2.1  |
| High vs Low    | 7  | 0.40 | -1.3-2.1  | 0.19 | -1.6-2.0  | -0.34 | -2.1-1.5  |
| High vs Low    | 8  | 0.61 | -0.90-2.1 | 0.44 | -1.1-2.0  | -0.17 | -1.7-1.4  |
| High vs Low    | 9  | 0.84 | -0.75-2.4 | 0.70 | -0.93-2.3 | 0.02  | -1.6-1.7  |
| High vs Low    | 10 | 1.1  | -0.66-2.9 | 0.97 | -0.84-2.8 | 0.23  | -1.6-2.0  |
| High vs Low    | 11 | 1.4  | -0.55-3.3 | 1.2  | -0.75-3.2 | 0.45  | -1.6-2.4  |
| High vs Low    | 12 | 1.7  | -0.44-3.8 | 1.5  | -0.67-3.7 | 0.68  | -1.5-2.9  |
| High vs Low    | 13 | 2.0  | -0.39-4.5 | 1.8  | -0.69-4.3 | 0.94  | -1.6-3.5  |
| High vs Medium | 7  | 0.19 | -1.4-1.8  | 0.07 | -1.4-1.5  | 0.42  | -1.1-2.0  |
| High vs Medium | 8  | 0.40 | -0.99-1.8 | 0.07 | -1.2-1.4  | 0.75  | -0.61-2.1 |
| High vs Medium | 9  | 0.52 | -0.94-2.0 | 0.02 | -1.3-1.4  | 0.98  | -0.45-2.4 |

|                |    |      |          |       |          |      |           |
|----------------|----|------|----------|-------|----------|------|-----------|
| High vs Medium | 10 | 0.56 | -1.1-2.2 | -0.06 | -1.6-1.4 | 1.1  | -0.47-2.7 |
| High vs Medium | 11 | 0.52 | -1.3-2.3 | -0.19 | -1.8-1.5 | 1.2  | -0.59-2.9 |
| High vs Medium | 12 | 0.40 | -1.6-2.4 | -0.36 | -2.2-1.5 | 1.1  | -0.83-3.0 |
| High vs Medium | 13 | 0.20 | -2.0-2.5 | -0.56 | -2.6-1.5 | 0.95 | -1.3-3.2  |

<sup>a</sup> MEHHP concentration categories: low, <29 µg/g creatinine); medium, 29-<88 µg/g creatinine; and high, >=88 µg/g creatinine).

MEOHP concentration categories: low, <15 µg/g creatinine; medium, 15-<44 µg/g creatinine; and high, >=44 µg/g creatinine. MECPP

concentration categories: low, <46 µg/g creatinine; medium, 46-<139 µg/g creatinine; and high, >=139 µg/g creatinine.

Table 7. Predicted differences in waist circumference (cm) from 7-13 years among girls comparing those with low, medium, and high concentrations of DEHP<sup>a</sup>.

| Comparisons of<br>Categories of<br>Concentrations | Age<br>(years) | Predicted<br>Difference,<br>cm | 95% CI   |
|---------------------------------------------------|----------------|--------------------------------|----------|
| Medium vs Low                                     | 7              | 0.10                           | -1.4-1.6 |
| Medium vs Low                                     | 8              | 0.06                           | -1.2-1.3 |
| Medium vs Low                                     | 9              | 0.13                           | -1.2-1.5 |

|                |    |      |           |
|----------------|----|------|-----------|
| Medium vs Low  | 10 | 0.31 | -1.2-1.8  |
| Medium vs Low  | 11 | 0.59 | -1.0-2.2  |
| Medium vs Low  | 12 | 0.97 | -0.83-2.8 |
| Medium vs Low  | 13 | 1.5  | -0.59-3.5 |
| High vs Low    | 7  | 0.20 | -1.5-1.7  |
| High vs Low    | 8  | 0.39 | -1.1-1.9  |
| High vs Low    | 9  | 0.61 | -0.92-2.1 |
| High vs Low    | 10 | 0.85 | -0.85-2.5 |
| High vs Low    | 11 | 1.1  | -0.76-3.0 |
| High vs Low    | 12 | 1.4  | -0.68-3.5 |
| High vs Low    | 13 | 1.7  | -0.66-4.0 |
| High vs Medium | 7  | 0.10 | -1.6-1.8  |
| High vs Medium | 8  | 0.33 | -1.1-1.8  |
| High vs Medium | 9  | 0.48 | -1.1-2.0  |

|                |    |      |          |
|----------------|----|------|----------|
| High vs Medium | 10 | 0.54 | -1.2-2.2 |
| High vs Medium | 11 | 0.52 | -1.3-2.4 |
| High vs Medium | 12 | 0.42 | -1.6-2.5 |
| High vs Medium | 13 | 0.23 | -2.1-2.6 |

<sup>a</sup>DEHP concentration categories: low, <111 µg/g creatinine; medium, 111- ≤278 µg/g creatinine; and high, >278 µg/g creatinine.

Table 8. Predicted differences in waist circumference (cm) from 7-13 years among girls comparing those with low, medium, and high concentrations MEP, MBP, and MiBP.

| Comparison of<br>Categories of<br>Concentrations | Age<br>(years) | MEP                            |          | MBP                            |           | MiBP                           |          |
|--------------------------------------------------|----------------|--------------------------------|----------|--------------------------------|-----------|--------------------------------|----------|
|                                                  |                | Predicted<br>Difference,<br>cm | 95% CI   | Predicted<br>Difference,<br>cm | 95% CI    | Predicted<br>Difference,<br>cm | 95% CI   |
| Medium vs Low                                    | 7              | -0.09                          | -1.7-1.5 | 0.99                           | -0.95-2.9 | -0.02                          | -1.6-1.6 |
| Medium vs Low                                    | 8              | 0.09                           | -1.3-1.5 | 0.95                           | -0.65-2.5 | -0.12                          | -1.5-1.2 |
| Medium vs Low                                    | 9              | 0.24                           | -1.2-1.7 | 0.82                           | -0.80-2.5 | -0.21                          | -1.6-1.2 |
| Medium vs Low                                    | 10             | 0.34                           | -1.2-1.9 | 0.62                           | -1.2-2.4  | -0.28                          | -1.8-1.2 |
| Medium vs Low                                    | 11             | 0.40                           | -1.3-2.1 | 0.34                           | -1.7-2.3  | -0.34                          | -2.0-1.4 |

|                |    |      |           |       |           |       |           |
|----------------|----|------|-----------|-------|-----------|-------|-----------|
| Medium vs Low  | 12 | 0.42 | -1.5-2.3  | -0.03 | -2.2-2.2  | -0.37 | -2.2-1.5  |
| Medium vs Low  | 13 | 0.41 | -1.8-2.6  | -0.47 | -3.0-2.0  | -0.38 | -2.5-1.7  |
| High vs Low    | 7  | 1.1  | -0.82-2.9 | 1.8   | -0.28-3.8 | 1.1   | -0.69-2.9 |
| High vs Low    | 8  | 1.7  | 0.14-3.3  | 1.7   | -0.06-3.4 | 1.1   | -0.47-2.6 |
| High vs Low    | 9  | 2.4  | 0.73-4.0  | 1.5   | -0.29-3.2 | 1.0   | -0.55-2.6 |
| High vs Low    | 10 | 2.9  | 1.1-4.7   | 1.2   | -0.73-3.2 | 1.0   | -0.74-2.8 |
| High vs Low    | 11 | 3.4  | 1.4-5.4   | 0.90  | -1.3-3.0  | 1.0   | -0.93-2.9 |
| High vs Low    | 12 | 3.9  | 1.7-6.1   | 0.52  | -1.8-2.9  | 1.0   | -1.1-3.1  |
| High vs Low    | 13 | 4.3  | 1.8-6.7   | 0.08  | -2.6-2.8  | 1.0   | -1.4-3.4  |
| High vs Medium | 7  | 1.1  | -0.50-2.8 | 0.79  | -0.68-2.3 | 1.1   | -0.47-2.7 |
| High vs Medium | 8  | 1.7  | 0.25-3.0  | 0.70  | -0.55-2.0 | 1.2   | -0.17-2.6 |
| High vs Medium | 9  | 2.1  | 0.69-3.6  | 0.64  | -0.66-1.9 | 1.3   | -0.17-2.7 |
| High vs Medium | 10 | 2.6  | 1.0-4.2   | 0.59  | -0.85-2.0 | 1.3   | -0.27-2.7 |
| High vs Medium | 11 | 3.0  | 1.3-4.8   | 0.56  | -1.0-2.2  | 1.3   | -0.39-3.1 |

|                |    |     |         |      |          |     |           |
|----------------|----|-----|---------|------|----------|-----|-----------|
| High vs Medium | 12 | 3.5 | 1.5-5.4 | 0.55 | -1.2-2.3 | 1.4 | -0.53-3.3 |
| High vs Medium | 13 | 3.8 | 1.6-6.0 | 0.56 | -1.4-2.6 | 1.4 | -0.76-3.6 |

<sup>a</sup> MEP concentration categories: low, <39 µg/g creatinine); medium, 39-<136 µg/g creatinine; and high, >=136 µg/g creatinine). MBP concentration categories: low, 22 µg/g creatinine; medium, 22-<67 µg/g creatinine; and high, >=67 µg/g creatinine. MiBP concentration categories: low, <8.9 µg/g creatinine; medium, 8.9-<22 µg/g creatinine; and high, >=22 µg/g creatinine.

Table 9. Predicted differences in height (cm) from 7-13 years among girls comparing those with low (<46 µg/g creatinine), medium (46-<139 µg/g creatinine), and high (>=139 µg/g creatinine) concentrations of MECPP for all girls and stratified by baseline overweight status (<85<sup>th</sup> percentile and >=85<sup>th</sup> percentile).

| Comparison of Categories of Concentrations | Age | All Girls (n=1017)       |            | Normal Weight Girls (n=692) |            | Overweight Girls (n=325) |           |
|--------------------------------------------|-----|--------------------------|------------|-----------------------------|------------|--------------------------|-----------|
|                                            |     | Predicted Difference, cm | 95% CI     | Predicted Difference, cm    | 95% CI     | Predicted Difference, cm | 95% CI    |
| Medium vs Low                              | 7   | -0.84                    | -1.8-0.11  | -1.2                        | -2.3--0.14 | 0.62                     | -0.96-2.2 |
| Medium vs Low                              | 8   | -1.2                     | -2.1--0.25 | -1.3                        | -2.4--0.29 | 0.05                     | -1.5-1.9  |

|                |    |       |            |       |            |       |           |
|----------------|----|-------|------------|-------|------------|-------|-----------|
| Medium vs Low  | 9  | -1.4  | -2.3--0.47 | -1.5  | -2.5--0.37 | -0.33 | -1.9-1.2  |
| Medium vs Low  | 10 | -1.5  | -2.5--0.56 | -1.5  | -2.7--0.42 | -0.50 | -2.1-1.1  |
| Medium vs Low  | 11 | -1.5  | -2.5--0.52 | -1.6  | -2.8--0.43 | -0.49 | -2.1-1.1  |
| Medium vs Low  | 12 | -1.4  | -2.4--0.37 | -1.6  | -2.9--0.42 | -0.28 | -2.0-1.4  |
| Medium vs Low  | 13 | -1.2  | -2.3--0.09 | -1.7  | -2.9--0.36 | 0.13  | -1.7-1.9  |
| High vs Low    | 7  | -1.2  | -2.3--0.12 | -1.5  | -2.8--0.24 | 0.07  | -1.7-1.9  |
| High vs Low    | 8  | -1.3  | -2.4--0.22 | -1.3  | -2.6--0.10 | -0.44 | -2.2-1.3  |
| High vs Low    | 9  | -1.4  | -2.5--0.29 | -1.3  | -2.6--0.04 | -0.76 | -2.5-0.98 |
| High vs Low    | 10 | -1.5  | -2.6--0.36 | -1.4  | -2.7--0.10 | -0.87 | -2.7-0.91 |
| High vs Low    | 11 | -1.6  | -2.7--0.42 | -1.7  | -3.0--0.27 | -0.78 | -2.6-1.1  |
| High vs Low    | 12 | -1.7  | -2.9--0.49 | -2.0  | -3.5--0.57 | -0.49 | -2.4-1.4  |
| High vs Low    | 13 | -1.8  | -3.1--0.55 | -2.5  | -4.0--0.98 | -0.01 | -2.0-2.0  |
| High vs Medium | 7  | -0.38 | -1.3-0.57  | -0.29 | -1.4-0.80  | -0.55 | -2.1-0.99 |
| High vs Medium | 8  | -0.12 | -1.1-0.82  | 0.00  | -1.1-1.1   | -0.49 | -2.0-1.0  |

|                |    |       |            |       |           |       |          |
|----------------|----|-------|------------|-------|-----------|-------|----------|
| High vs Medium | 9  | 0.03  | -0.92-0.97 | 0.14  | -0.96-1.2 | -0.43 | -1.9-1.1 |
| High vs Medium | 10 | 0.05  | -0.93-1.0  | 0.12  | -1.0-1.3  | -0.36 | -1.9-1.2 |
| High vs Medium | 11 | -0.06 | -1.1-0.95  | -0.05 | -1.2-1.2  | -0.29 | -1.9-1.3 |
| High vs Medium | 12 | -0.28 | -1.3-0.76  | -0.37 | -1.6-0.88 | -0.22 | -1.9-1.4 |
| High vs Medium | 13 | -0.64 | -1.7-0.46  | -0.85 | -2.2-0.48 | -0.13 | -1.9-1.6 |

Table 10. Predicted differences in height (cm) from 7-13 years among girls comparing those with low (<15 µg/g creatinine), medium (15-<44 µg/g creatinine), and high (>=44 µg/g creatinine) concentrations of MEOHP for all girls and stratified by baseline overweight status (<85th percentile and >=85<sup>th</sup> percentile).

| Comparisons of<br>Categories of<br>Concentrations | Age<br>(years) | All Girls (n=1017)             |        | Normal Weight Girls<br>(n=692) |        | Overweight Girls (n=325)       |        |
|---------------------------------------------------|----------------|--------------------------------|--------|--------------------------------|--------|--------------------------------|--------|
|                                                   |                | Predicted<br>Difference,<br>cm | 95% CI | Predicted<br>Difference,<br>cm | 95% CI | Predicted<br>Difference,<br>cm | 95% CI |

---

|               |    |       |            |       |            |       |           |
|---------------|----|-------|------------|-------|------------|-------|-----------|
| Medium vs Low | 7  | -0.33 | -1.4-0.68  | -0.47 | -1.6-0.66  | -0.15 | -1.9-1.6  |
| Medium vs Low | 8  | -0.40 | -1.4-0.60  | -0.59 | -1.7-0.53  | -0.29 | -2.0-1.4  |
| Medium vs Low | 9  | -0.42 | -1.4-0.58  | -0.65 | -1.8-0.49  | -0.37 | -2.1-1.3  |
| Medium vs Low | 10 | -0.42 | -1.4-0.61  | -0.67 | -1.9-0.52  | -0.39 | -2.1-1.3  |
| Medium vs Low | 11 | -0.37 | -1.4-0.69  | -0.62 | -1.9-0.62  | -0.34 | -2.1-1.4  |
| Medium vs Low | 12 | -0.29 | -1.4-0.81  | -0.52 | -1.8-0.77  | -0.23 | -2.1-1.6  |
| Medium vs Low | 13 | -0.17 | -1.3-0.99  | -0.37 | -1.7-1.0   | -0.05 | -2.0-1.9  |
| High vs Low   | 7  | -1.1  | -2.2--0.02 | -1.3  | -2.5--0.04 | -0.40 | -2.3-1.5  |
| High vs Low   | 8  | -1.1  | -2.1-0.00  | -1.1  | -2.3-0.15  | -0.87 | -2.7-0.93 |
| High vs Low   | 9  | -1.1  | -2.1-0.03  | -0.97 | -2.2-0.27  | -1.2  | -3.0-0.65 |
| High vs Low   | 10 | -1.1  | -2.2-0.05  | -0.97 | -2.3-0.31  | -1.3  | -3.1-0.60 |
| High vs Low   | 11 | -1.1  | -2.3-0.05  | -1.1  | -2.4-0.26  | -1.2  | -3.1-0.75 |
| High vs Low   | 12 | -1.2  | -2.4-0.02  | -1.3  | -2.7-0.11  | -0.88 | -2.9-1.1  |
| High vs Low   | 13 | -1.3  | -2.5--0.02 | -1.6  | -3.1--0.12 | -0.41 | -2.5-1.7  |

|                |    |       |            |       |           |       |           |
|----------------|----|-------|------------|-------|-----------|-------|-----------|
| High vs Medium | 7  | -0.79 | -1.7-0.12  | -0.79 | -1.8-0.24 | -0.25 | -1.7-1.2  |
| High vs Medium | 8  | -0.67 | -1.6-0.21  | -0.47 | -1.5-0.54 | -0.58 | -2.0-0.83 |
| High vs Medium | 9  | -0.63 | -1.5-0.27  | -0.31 | -1.4-0.73 | -0.78 | -2.2-0.64 |
| High vs Medium | 10 | -0.65 | -1.6-0.27  | -0.31 | -1.4-0.77 | -0.86 | -2.3-0.60 |
| High vs Medium | 11 | -0.73 | -1.7-0.22  | -0.46 | -1.6-0.67 | -0.82 | -2.3-0.68 |
| High vs Medium | 12 | -0.88 | -1.9-0.10  | -0.77 | -2.0-0.41 | -0.65 | -2.2-0.91 |
| High vs Medium | 13 | -1.1  | -2.1--0.06 | -1.2  | -2.5-0.01 | -0.36 | -2.0-1.3  |

Table 11. Predicted differences in height (cm) from 7-13 years among girls comparing those with low (<29 µg/g creatinine), medium (29-<88 µg/g creatinine), and high (>=88 µg/g creatinine) concentrations of MEHHP for all girls and stratified by baseline overweight status (<85th percentile and >=85<sup>th</sup> percentile).

| Comparison of<br>Categories of<br>Concentrations | Age<br>(years) | All Girls (n=1017)             |        | Normal Weight Girls<br>(n=692) |        | Overweight Girls (n=325)       |        |
|--------------------------------------------------|----------------|--------------------------------|--------|--------------------------------|--------|--------------------------------|--------|
|                                                  |                | Predicted<br>Difference,<br>cm | 95% CI | Predicted<br>Difference,<br>cm | 95% CI | Predicted<br>Difference,<br>cm | 95% CI |

---

|               |    |       |           |       |           |       |          |
|---------------|----|-------|-----------|-------|-----------|-------|----------|
| Medium vs Low | 7  | -0.47 | -1.4-0.45 | -0.80 | -1.8-0.23 | 0.49  | -1.0-2.0 |
| Medium vs Low | 8  | -0.69 | -1.6-0.20 | -0.95 | -2.0-0.06 | 0.07  | -1.4-1.6 |
| Medium vs Low | 9  | -0.82 | -1.7-0.09 | -1.0  | -2.1-0.00 | -0.19 | -1.7-1.3 |
| Medium vs Low | 10 | -0.85 | -1.8-0.09 | -1.1  | -2.1-0.03 | -0.28 | -1.8-1.3 |
| Medium vs Low | 11 | -0.77 | -1.7-0.19 | -1.0  | -2.1-0.12 | -0.20 | -1.8-1.4 |
| Medium vs Low | 12 | -0.61 | -1.6-0.40 | -0.90 | -2.1-0.28 | 0.06  | -1.6-1.7 |
| Medium vs Low | 13 | -0.34 | -1.4-0.71 | -0.73 | -2.0-0.52 | 0.48  | -1.3-2.2 |
| High vs Low   | 7  | -0.85 | -1.9-0.21 | -1.0  | -2.2-0.18 | -0.01 | -1.7-1.7 |
| High vs Low   | 8  | -0.71 | -1.8-0.34 | -0.71 | -1.9-0.48 | -0.37 | -2.2-1.3 |
| High vs Low   | 9  | -0.61 | -1.7-0.44 | -0.53 | -1.8-0.69 | -0.56 | -2.3-1.1 |
| High vs Low   | 10 | -0.57 | -1.7-0.51 | -0.49 | -1.8-0.78 | -0.59 | -2.3-1.2 |
| High vs Low   | 11 | -0.59 | -1.7-0.53 | -0.58 | -1.9-0.74 | -0.45 | -2.2-1.3 |
| High vs Low   | 12 | -0.65 | -1.8-0.51 | -0.82 | -2.2-0.57 | -0.15 | -2.0-1.7 |
| High vs Low   | 13 | -0.77 | -2.0-0.45 | -1.2  | -2.7-0.29 | 0.32  | -1.6-2.3 |

|                |    |       |            |       |           |       |          |
|----------------|----|-------|------------|-------|-----------|-------|----------|
| High vs Medium | 7  | -0.38 | -1.4-0.60  | -0.22 | -1.3-0.90 | -0.50 | -2.1-1.1 |
| High vs Medium | 8  | -0.01 | -0.97-0.94 | 0.24  | -0.86-1.4 | -0.44 | -2.0-1.1 |
| High vs Medium | 9  | 0.21  | -0.76-1.2  | 0.51  | -0.62-1.6 | -0.37 | -1.9-1.2 |
| High vs Medium | 10 | 0.27  | -0.72-1.3  | 0.57  | -0.61-1.7 | -0.31 | -1.9-1.3 |
| High vs Medium | 11 | 0.19  | -0.84-1.2  | 0.43  | -0.80-1.7 | -0.26 | -1.9-1.4 |
| High vs Medium | 12 | -0.05 | -1.1-1.0   | 0.09  | -1.2-1.4  | -0.21 | -1.9-1.5 |
| High vs Medium | 13 | -0.43 | -1.6-0.70  | -0.45 | -1.8-0.91 | -0.16 | -1.9-1.6 |

Table 12. Predicted differences in height (cm) from 7-13 years among girls comparing those with low (<2.8 µg/g creatinine), medium (2.8-<5.6 µg/g creatinine), and high (≥5.6 µg/g creatinine) concentrations of MEHP for all girls and stratified by baseline overweight status (<85<sup>th</sup> percentile and ≥85<sup>th</sup> percentile).

| Comparisons of<br>Categories of<br>Concentrations | Age<br>(years) | All Girls (n=1017)             |           | Normal Weight Girls (n=692)    |           | Overweight Girls (n=325)       |           |
|---------------------------------------------------|----------------|--------------------------------|-----------|--------------------------------|-----------|--------------------------------|-----------|
|                                                   |                | Predicted<br>Difference,<br>cm | 95% CI    | Predicted<br>Difference,<br>cm | 95% CI    | Predicted<br>Difference,<br>cm | 95% CI    |
| Medium vs Low                                     | 7              | -0.11                          | -1.1-0.88 | -0.72                          | -1.9-0.41 | 0.79                           | -0.81-2.4 |

|                |    |       |            |       |            |       |           |
|----------------|----|-------|------------|-------|------------|-------|-----------|
| Medium vs Low  | 8  | -0.31 | -1.3-0.66  | -1.0  | -2.2-0.08  | 0.94  | -0.61-2.5 |
| Medium vs Low  | 9  | -0.44 | -1.4-0.55  | -1.3  | -2.4--0.11 | 1.1   | -0.51-2.6 |
| Medium vs Low  | 10 | -0.48 | -1.5-0.53  | -1.4  | -2.6--0.19 | 1.1   | -0.45-2.7 |
| Medium vs Low  | 11 | -0.44 | -1.5-0.60  | -1.4  | -2.6--0.15 | 1.2   | -0.45-2.9 |
| Medium vs Low  | 12 | -0.33 | -1.4-0.76  | -1.3  | -2.6--0.01 | 1.2   | -0.48-2.9 |
| Medium vs Low  | 13 | -0.13 | -1.3-1.0   | -1.1  | -2.5-0.24  | 1.2   | -0.57-3.0 |
| High vs Low    | 7  | -0.94 | -1.9--0.01 | -1.2  | -2.2--0.13 | 0.11  | -1.5-1.7  |
| High vs Low    | 8  | -1.0  | -1.9--0.10 | -1.2  | -2.2--0.17 | 0.06  | -1.5-1.6  |
| High vs Low    | 9  | -1.0  | -2.0--0.12 | -1.2  | -2.3--0.17 | 0.09  | -1.4-1.6  |
| High vs Low    | 10 | -1.0  | -2.0--0.08 | -1.3  | -2.4--0.16 | 0.20  | -1.4-1.8  |
| High vs Low    | 11 | -0.98 | -2.0-0.00  | -1.3  | -2.4--0.15 | 0.37  | -1.2-2.0  |
| High vs Low    | 12 | -0.89 | -1.9-0.13  | -1.3  | -2.5--0.13 | 0.62  | -1.1-2.3  |
| High vs Low    | 13 | -0.75 | -1.8-0.32  | -1.4  | -2.6--0.09 | 0.94  | -0.82-2.7 |
| High vs Medium | 7  | -0.83 | -1.8-0.13  | -0.46 | -1.6-0.64  | -0.69 | -2.2-0.87 |

|                |    |       |           |       |           |       |           |
|----------------|----|-------|-----------|-------|-----------|-------|-----------|
| High vs Medium | 8  | -0.70 | -1.6-0.24 | -0.17 | -1.3-0.91 | -0.88 | -2.4-0.63 |
| High vs Medium | 9  | -0.61 | -1.6-0.34 | 0.03  | -1.1-1.1  | -0.96 | -2.5-0.55 |
| High vs Medium | 10 | -0.55 | -1.5-0.42 | 0.11  | -1.0-1.3  | -0.95 | -2.5-0.60 |
| High vs Medium | 11 | -0.54 | -1.6-0.47 | 0.10  | -1.1-1.3  | -0.83 | -2.4-0.77 |
| High vs Medium | 12 | -0.56 | -1.6-0.49 | -0.02 | -1.3-1.2  | -0.61 | -2.3-1.1  |
| High vs Medium | 13 | -0.62 | -1.7-0.48 | -0.23 | -1.6-1.1  | -0.29 | -2.0-1.5  |

Table 13. Predicted differences in height (cm) from 7-13 years among girls comparing those with low (<5.0 µg/g creatinine), medium (5.0-<10 µg/g creatinine), and high (>=10 µg/g creatinine) concentrations of MCPP for all girls and stratified by baseline overweight status (<85<sup>th</sup> percentile and >=85<sup>th</sup> percentile).

| Comparisons of<br>Categories of<br>Concentrations | Age<br>(years) | All Girls (n=1017)             |           | Normal Weight Girls (n=692)    |           | Overweight Girls (n=325)       |          |
|---------------------------------------------------|----------------|--------------------------------|-----------|--------------------------------|-----------|--------------------------------|----------|
|                                                   |                | Predicted<br>Difference,<br>cm | 95% CI    | Predicted<br>Difference,<br>cm | 95% CI    | Predicted<br>Difference,<br>cm | 95% CI   |
| Medium vs Low                                     | 7              | -0.48                          | -1.4-0.44 | -0.62                          | -1.7-0.42 | 0.17                           | -1.3-1.7 |
| Medium vs Low                                     | 8              | -0.82                          | -1.7-0.08 | -0.97                          | -2.0-0.06 | -0.06                          | -1.5-1.4 |

|                |    |       |            |       |            |       |           |
|----------------|----|-------|------------|-------|------------|-------|-----------|
| Medium vs Low  | 9  | -1.0  | -2.0--0.12 | -1.2  | -2.3--0.14 | -0.19 | -1.7-1.3  |
| Medium vs Low  | 10 | -1.1  | -2.1--0.18 | -1.3  | -2.4--0.20 | -0.22 | -1.8-1.3  |
| Medium vs Low  | 11 | -1.1  | -2.0--0.09 | -1.3  | -2.4--0.13 | -0.16 | -1.7-1.4  |
| Medium vs Low  | 12 | -0.87 | -1.9-0.14  | -1.1  | -2.3-0.07  | 0.01  | -1.6-1.7  |
| Medium vs Low  | 13 | -0.55 | -1.6-0.51  | -0.87 | -2.1-0.40  | 0.27  | -1.5-2.0  |
| High vs Low    | 7  | -1.0  | -2.1--0.01 | -1.1  | -2.2-0.05  | -0.45 | -2.2-1.3  |
| High vs Low    | 8  | -1.8  | -2.8--0.81 | -1.8  | -3.0--0.69 | -1.15 | -2.8-0.52 |
| High vs Low    | 9  | -2.3  | -3.4--1.3  | -2.4  | -3.5--1.2  | -1.55 | -3.2-0.13 |
| High vs Low    | 10 | -2.6  | -3.6--1.5  | -2.7  | -3.9--1.5  | -1.66 | -3.4-0.07 |
| High vs Low    | 11 | -2.6  | -3.7--1.5  | -2.8  | -4.0--1.5  | -1.48 | -3.3-0.30 |
| High vs Low    | 12 | -2.3  | -3.4--1.2  | -2.6  | -4.0--1.3  | -1.01 | -2.9-0.85 |
| High vs Low    | 13 | -1.7  | -2.9--0.54 | -2.3  | -3.7--0.88 | -0.25 | -2.2-1.7  |
| High vs Medium | 7  | -0.55 | -1.5-0.43  | -0.48 | -1.6-0.62  | -0.63 | -2.3-1.1  |
| High vs Medium | 8  | -0.99 | -2.0--0.02 | -0.87 | -2.0-0.22  | -1.1  | -2.7-0.55 |

|                |    |      |            |      |            |       |           |
|----------------|----|------|------------|------|------------|-------|-----------|
| High vs Medium | 9  | -1.3 | -2.3--0.31 | -1.2 | -2.3--0.05 | -1.4  | -3.0-0.30 |
| High vs Medium | 10 | -1.5 | -2.5--0.45 | -1.4 | -2.5--0.21 | -1.4  | -3.1-0.26 |
| High vs Medium | 11 | -1.5 | -2.6--0.46 | -1.5 | -2.7--0.27 | -1.3  | -3.1-0.43 |
| High vs Medium | 12 | -1.4 | -2.5--0.32 | -1.5 | -2.8--0.22 | -1.0  | -2.9-0.81 |
| High vs Medium | 13 | -1.2 | -2.3--0.03 | -1.4 | -2.8--0.07 | -0.52 | -2.5-1.4  |

Table 14. Predicted differences in height (cm) from 7-13 years among girls comparing those with low (13 µg/g creatinine), medium (13-<38 µg/g creatinine), and high (>=38 µg/g creatinine) concentrations of MBZP for all girls and stratified by baseline overweight status (<85<sup>th</sup> percentile and >=85<sup>th</sup> percentile).

| Comparison of Categories of Concentrations | Age (years) | All Girls (n=1017)       |           | Normal Weight Girls (n=692) |           | Overweight Girls (n=325) |          |
|--------------------------------------------|-------------|--------------------------|-----------|-----------------------------|-----------|--------------------------|----------|
|                                            |             | Predicted Difference, cm | 95% CI    | Predicted Difference, cm    | 95% CI    | Predicted Difference, cm | 95% CI   |
| Medium vs Low                              | 7           | -0.16                    | -1.1-0.76 | -0.32                       | -1.4-0.72 | -0.36                    | -1.9-1.2 |
| Medium vs Low                              | 8           | -0.29                    | -1.2-0.61 | -0.68                       | -1.7-0.36 | -0.37                    | -1.9-1.1 |
| Medium vs Low                              | 9           | -0.38                    | -1.3-0.53 | -0.90                       | -2.0-0.16 | -0.35                    | -1.9-1.1 |

|                |    |       |            |       |            |       |           |
|----------------|----|-------|------------|-------|------------|-------|-----------|
| Medium vs Low  | 10 | -0.43 | -1.4-0.51  | -0.99 | -2.1-0.11  | -0.32 | -1.9-1.2  |
| Medium vs Low  | 11 | -0.44 | -1.4-0.53  | -0.95 | -2.1-0.20  | -0.28 | -1.9-1.3  |
| Medium vs Low  | 12 | -0.41 | -1.4-0.60  | -0.78 | -2.0-0.43  | -0.22 | -1.9-1.4  |
| Medium vs Low  | 13 | -0.34 | -1.4-0.72  | -0.47 | -1.8-0.80  | -0.15 | -1.9-1.6  |
| High vs Low    | 7  | -1.0  | -2.1-0.03  | -1.0  | -2.2-0.12  | -0.11 | -2.0-1.7  |
| High vs Low    | 8  | -1.2  | -2.3--0.18 | -1.2  | -2.4--0.07 | -0.45 | -2.3-1.4  |
| High vs Low    | 9  | -1.4  | -2.5--0.35 | -1.4  | -2.6--0.23 | -0.70 | -2.5-1.1  |
| High vs Low    | 10 | -1.6  | -2.7--0.50 | -1.6  | -2.8--0.38 | -0.87 | -2.7-1.0  |
| High vs Low    | 11 | -1.8  | -2.9--0.64 | -1.8  | -3.1--0.53 | -0.95 | -2.9-0.98 |
| High vs Low    | 12 | -1.9  | -3.1--0.75 | -2.0  | -3.4--0.69 | -0.94 | -3.0-1.1  |
| High vs Low    | 13 | -2.1  | -3.3--0.85 | -2.3  | -3.7--0.83 | -0.85 | -3.0-1.3  |
| High vs Medium | 7  | -0.87 | -1.8-0.09  | -0.72 | -1.8-0.36  | 0.26  | -1.4-1.9  |
| High vs Medium | 8  | -0.93 | -1.9-0.01  | -0.55 | -1.6-0.52  | -0.08 | -1.7-1.5  |
| High vs Medium | 9  | -1.0  | -2.0--0.07 | -0.52 | -1.6-0.58  | -0.35 | -2.0-1.3  |

|                |    |      |            |       |            |       |          |
|----------------|----|------|------------|-------|------------|-------|----------|
| High vs Medium | 10 | -1.2 | -2.1--0.17 | -0.63 | -1.8-0.52  | -0.54 | -2.2-1.1 |
| High vs Medium | 11 | -1.3 | -2.3--0.29 | -0.87 | -2.1-0.32  | -0.67 | -2.4-1.0 |
| High vs Medium | 12 | -1.5 | -2.6--0.45 | -1.3  | -2.5--0.01 | -0.72 | -2.5-1.1 |
| High vs Medium | 13 | -1.7 | -2.9--0.62 | -1.8  | -3.1--0.46 | -0.70 | -2.6-1.2 |

Table 15. Predicted differences in height (cm) from 7-13 years among girls comparing those with low (<111 µg/g creatinine), medium (111- <278 µg/g creatinine), and high (>=278 µg/g creatinine) concentrations of DEHP for all girls and stratified by baseline overweight status (<85<sup>th</sup> percentile and >=85<sup>th</sup> percentile).

| Comparison of<br>Categories of<br>Concentrations | Age<br>(years) | All Girls (n=1017)             |           | Normal Weight Girls (n=692)    |           | Overweight Girls (n=325)       |           |
|--------------------------------------------------|----------------|--------------------------------|-----------|--------------------------------|-----------|--------------------------------|-----------|
|                                                  |                | Predicted<br>Difference,<br>cm | 95% CI    | Predicted<br>Difference,<br>cm | 95% CI    | Predicted<br>Difference,<br>cm | 95% CI    |
| Medium vs Low                                    | 7              | -0.30                          | -1.2-0.60 | -0.84                          | -1.8-0.17 | 1.4                            | -0.14-2.9 |
| Medium vs Low                                    | 8              | -0.50                          | -1.4-0.38 | -0.91                          | -1.9-0.08 | 0.98                           | -0.47-2.4 |
| Medium vs Low                                    | 9              | -0.60                          | -1.5-0.28 | -0.96                          | -2.0-0.05 | 0.79                           | -0.67-2.3 |
| Medium vs Low                                    | 10             | -0.61                          | -1.5-0.30 | -0.98                          | -2.0-0.07 | 0.78                           | -0.72-2.3 |

|                |    |       |            |       |            |       |           |
|----------------|----|-------|------------|-------|------------|-------|-----------|
| Medium vs Low  | 11 | -0.53 | -1.5-0.41  | -0.98 | -2.1-0.12  | 0.95  | -0.60-2.5 |
| Medium vs Low  | 12 | -0.36 | -1.3-0.62  | -0.95 | -2.1-0.20  | 1.3   | -0.30-2.9 |
| Medium vs Low  | 13 | -0.09 | -1.1-0.94  | -0.90 | -2.1-0.32  | 1.8   | 0.15-3.5  |
| High vs Low    | 7  | -0.98 | -2.0-0.04  | -1.1  | -2.3-0.05  | -0.15 | -1.8-1.5  |
| High vs Low    | 8  | -0.89 | -1.9-0.12  | -0.82 | -2.0-0.34  | -0.51 | -2.1-1.1  |
| High vs Low    | 9  | -0.84 | -1.9-0.17  | -0.67 | -1.9-0.51  | -0.72 | -2.3-0.89 |
| High vs Low    | 10 | -0.85 | -1.9-0.20  | -0.67 | -1.9-0.56  | -0.78 | -2.4-0.87 |
| High vs Low    | 11 | -0.91 | -2.0-0.17  | -0.82 | -2.1-0.46  | -0.69 | -2.4-1.0  |
| High vs Low    | 12 | -1.0  | -2.1-0.10  | -1.1  | -2.5-0.22  | -0.45 | -2.2-1.3  |
| High vs Low    | 13 | -1.2  | -2.4--0.01 | -1.6  | -3.0--0.15 | -0.06 | -1.9-1.8  |
| High vs Medium | 7  | -0.69 | -1.7-0.34  | -0.28 | -1.4-0.89  | -1.5  | -3.1-0.12 |
| High vs Medium | 8  | -0.39 | -1.4-0.61  | 0.09  | -1.1-1.2   | -1.5  | -3.1-0.09 |
| High vs Medium | 9  | -0.24 | -1.3-0.77  | 0.29  | -0.89-1.5  | -1.5  | -3.1-0.09 |
| High vs Medium | 10 | -0.23 | -1.3-0.81  | 0.31  | -0.92-1.5  | -1.6  | -3.2-0.08 |

|                |    |       |           |       |           |      |            |
|----------------|----|-------|-----------|-------|-----------|------|------------|
| High vs Medium | 11 | -0.37 | -1.5-0.70 | 0.16  | -1.1-1.4  | -1.6 | -3.3-0.05  |
| High vs Medium | 12 | -0.66 | -1.8-0.45 | -0.17 | -1.5-1.2  | -1.8 | -3.5-0.00  |
| High vs Medium | 13 | -1.1  | -2.3-0.08 | -0.68 | -2.1-0.74 | -1.9 | -3.8--0.06 |

Table 16. Predicted differences in height (cm) from 7-13 years among girls comparing those with low, medium, and high concentrations MEP, MBP, and MiBP<sup>a</sup>.

| Comparisons of<br>Categories of<br>Concentrations | Age<br>(years) | MEP                            |           | MBP                            |           | MiBP                           |           |
|---------------------------------------------------|----------------|--------------------------------|-----------|--------------------------------|-----------|--------------------------------|-----------|
|                                                   |                | Predicted<br>Difference,<br>cm | 95% CI    | Predicted<br>Difference,<br>cm | 95% CI    | Predicted<br>Difference,<br>cm | 95% CI    |
| Medium vs Low                                     | 7              | -0.74                          | -1.7-0.23 | -0.09                          | -1.2-1.0  | -0.85                          | -1.8-0.09 |
| Medium vs Low                                     | 8              | -0.66                          | -1.6-0.29 | -0.16                          | -1.3-0.92 | -0.77                          | -1.7-0.15 |
| Medium vs Low                                     | 9              | -0.63                          | -1.6-0.34 | -0.26                          | -1.4-0.84 | -0.76                          | -1.7-0.18 |
| Medium vs Low                                     | 10             | -0.64                          | -1.6-0.35 | -0.38                          | -1.5-0.75 | -0.79                          | -1.8-0.17 |
| Medium vs Low                                     | 11             | -0.70                          | -1.7-0.33 | -0.53                          | -1.7-0.64 | -0.89                          | -1.9-0.11 |
| Medium vs Low                                     | 12             | -0.81                          | -1.9-0.26 | -0.71                          | -1.9-0.50 | -1.0                           | -2.1-0.00 |

|                |    |       |           |       |            |       |            |
|----------------|----|-------|-----------|-------|------------|-------|------------|
| Medium vs Low  | 13 | -0.97 | -2.1-0.16 | -0.92 | -2.2-0.36  | -1.3  | -2.3--0.16 |
| High vs Low    | 7  | -0.64 | -1.8-0.48 | -0.53 | -1.7-0.66  | -0.76 | -1.8-0.31  |
| High vs Low    | 8  | -0.32 | -1.4-0.78 | -0.62 | -1.8-0.55  | -0.68 | -1.7-0.38  |
| High vs Low    | 9  | -0.16 | -1.3-0.95 | -0.73 | -1.9-0.45  | -0.64 | -1.7-0.43  |
| High vs Low    | 10 | -0.16 | -1.3-0.99 | -0.87 | -2.1-0.34  | -0.65 | -1.8-0.45  |
| High vs Low    | 11 | -0.31 | -1.5-0.88 | -1.1  | -2.3-0.21  | -0.71 | -1.9-0.43  |
| High vs Low    | 12 | -0.61 | -1.8-0.63 | -1.3  | -2.6-0.05  | -0.82 | -2.0-0.37  |
| High vs Low    | 13 | -1.1  | -2.4-0.24 | -1.5  | -2.9--0.12 | -0.97 | -2.2-0.28  |
| High vs Medium | 7  | 0.11  | -0.87-1.1 | -0.44 | -1.3-0.44  | 0.09  | -0.86-1.0  |
| High vs Medium | 8  | 0.34  | -0.62-1.3 | -0.46 | -1.3-0.41  | 0.10  | -0.84-1.0  |
| High vs Medium | 9  | 0.46  | -0.51-1.4 | -0.47 | -1.4-0.40  | 0.11  | -0.84-1.1  |
| High vs Medium | 10 | 0.48  | -0.52-1.5 | -0.50 | -1.4-0.41  | 0.14  | -0.84-1.1  |
| High vs Medium | 11 | 0.39  | -0.64-1.4 | -0.52 | -1.5-0.41  | 0.18  | -0.84-1.2  |
| High vs Medium | 12 | 0.20  | -0.87-1.3 | -0.55 | -1.5-0.42  | 0.22  | -0.83-1.3  |

|                |    |       |          |       |           |      |           |
|----------------|----|-------|----------|-------|-----------|------|-----------|
| High vs Medium | 13 | -0.10 | -1.2-1.0 | -0.58 | -1.6-0.45 | 0.28 | -0.84-1.4 |
|----------------|----|-------|----------|-------|-----------|------|-----------|

<sup>a</sup> MEP concentration categories: low, <39 µg/g creatinine); medium, 39-<136 µg/g creatinine; and high, >=136 µg/g creatinine). MBP concentration categories: low, <22 µg/g creatinine; medium, 22-<67 µg/g creatinine; and high, >=67 µg/g creatinine. MiBP concentration categories: low, <8.9 µg/g creatinine; medium, 8.9-<22 µg/g creatinine; and high, >=22 µg/g creatinine.
